# Supplementary material
Source: publisher figshare collection journal article supplement (https://acs.figshare.com/ndownloader/files/17990756)
Supplement: Supplementary file 1 [file 17990756]

# Supporting Information

Sandwich-nanostructured  $n\text{-Cu}_2\text{O}/\text{AuAg}/p\text{-Cu}_2\text{O}$

Photocathode with Highly Positive Onset Potential  
for Improved Water Reduction

Yu-Chang Lin,<sup>†</sup> Liang-Ching Hsu,<sup>‡</sup> Chia-Yu Lin,<sup>§</sup> Chao-Lung Chiang,<sup>‡</sup> Che-Min Chou,<sup>‡</sup>

Wen-Wei Wu,<sup>†</sup> San-Yuan Chen,<sup>\*,†,¶</sup> Yan-Gu Lin<sup>\*,‡</sup>

<sup>†</sup>Department of Material Science and Engineering, National Chiao Tung University,  
Hsinchu 30010, Taiwan

<sup>‡</sup>National Synchrotron Radiation Research Center, Hsinchu 30076, Taiwan

<sup>§</sup>Department of Chemical Engineering, National Cheng Kung University, Tainan 70101, Taiwan

<sup>¶</sup>Frontier Research Center on Fundamental and Applied Sciences of Matters, National  
Tsing Hua University, Hsinchu 30013, Taiwan

KEYWORDS: solar water splitting; sandwich structure; copper(I) oxide; photocathode;  
localized surface-plasmon resonance.

**Corresponding Author:** \*E-mail: sanyuanchen@mail.nctu.edu.tw (Prof. San-Yuan Chen); \*E-mail: lin.yg@nsrrc.org.tw (Dr. Yan-Gu Lin).

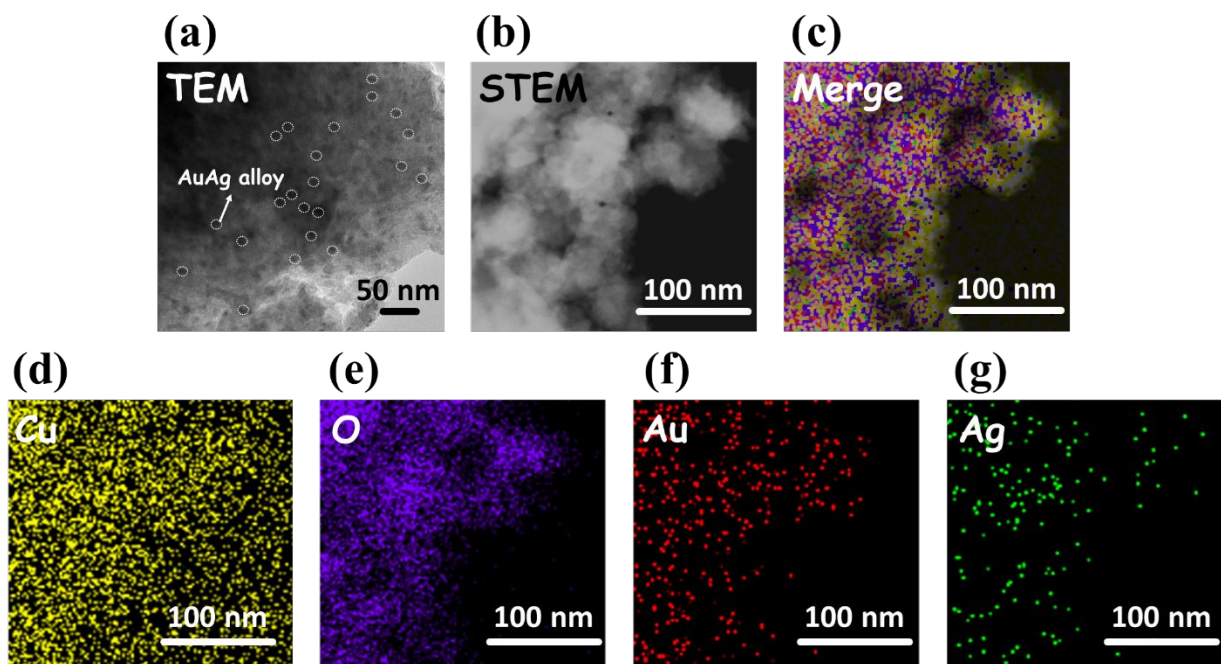

**Figure S1.** (a) TEM, (b) STEM images of an as-prepared  $n\text{-Cu}_2\text{O}/\text{AuAg}/p\text{-Cu}_2\text{O}$  with the corresponding element mappings of (c) merge, (d) Cu, (e) O, (f) Au, and (g) Ag.

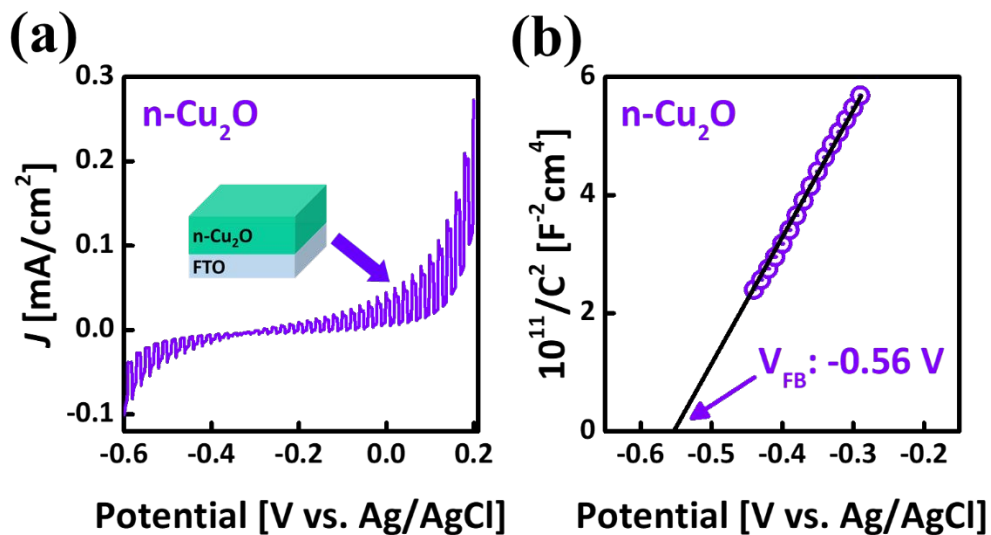

**Figure S2.** (a)  $n\text{-Cu}_2\text{O}$  with LSV measured under chopped light ( $100 \text{ mW cm}^{-2}$ ). The arrow shows the position where a transition from anodic photocurrent to cathodic photocurrent is observed. (b) Mott-Schottky plot of  $n\text{-Cu}_2\text{O}$ . A  $0.5 \text{ M Na}_2\text{SO}_4$  solution was used as the electrolyte for these measurements.

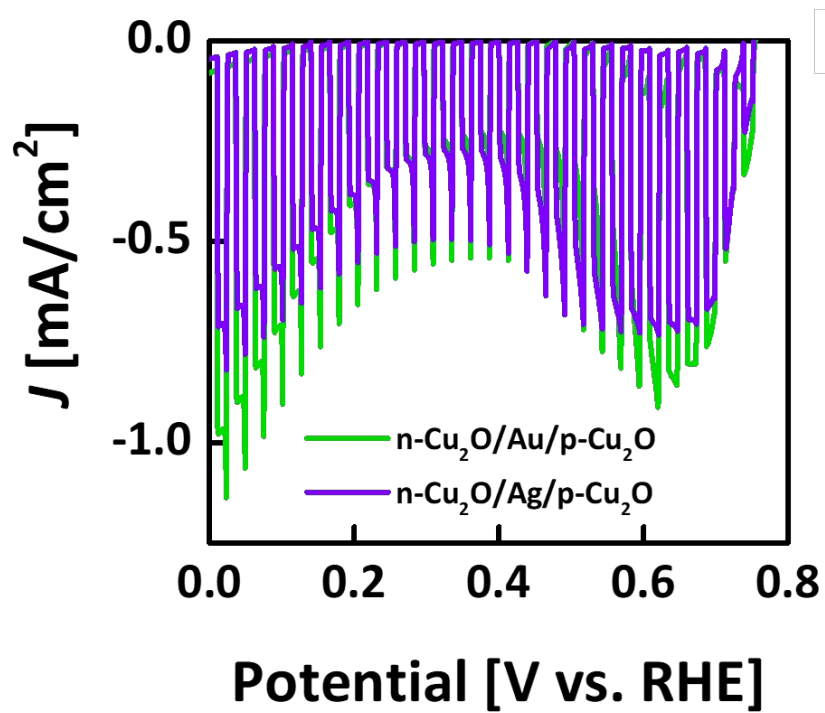

**Figure S3.** Photocatalytic activities of  $p$ - $n$  homojunction with Au and Ag plasmonic NPs insertion under chopped AM 1.5 G illumination.

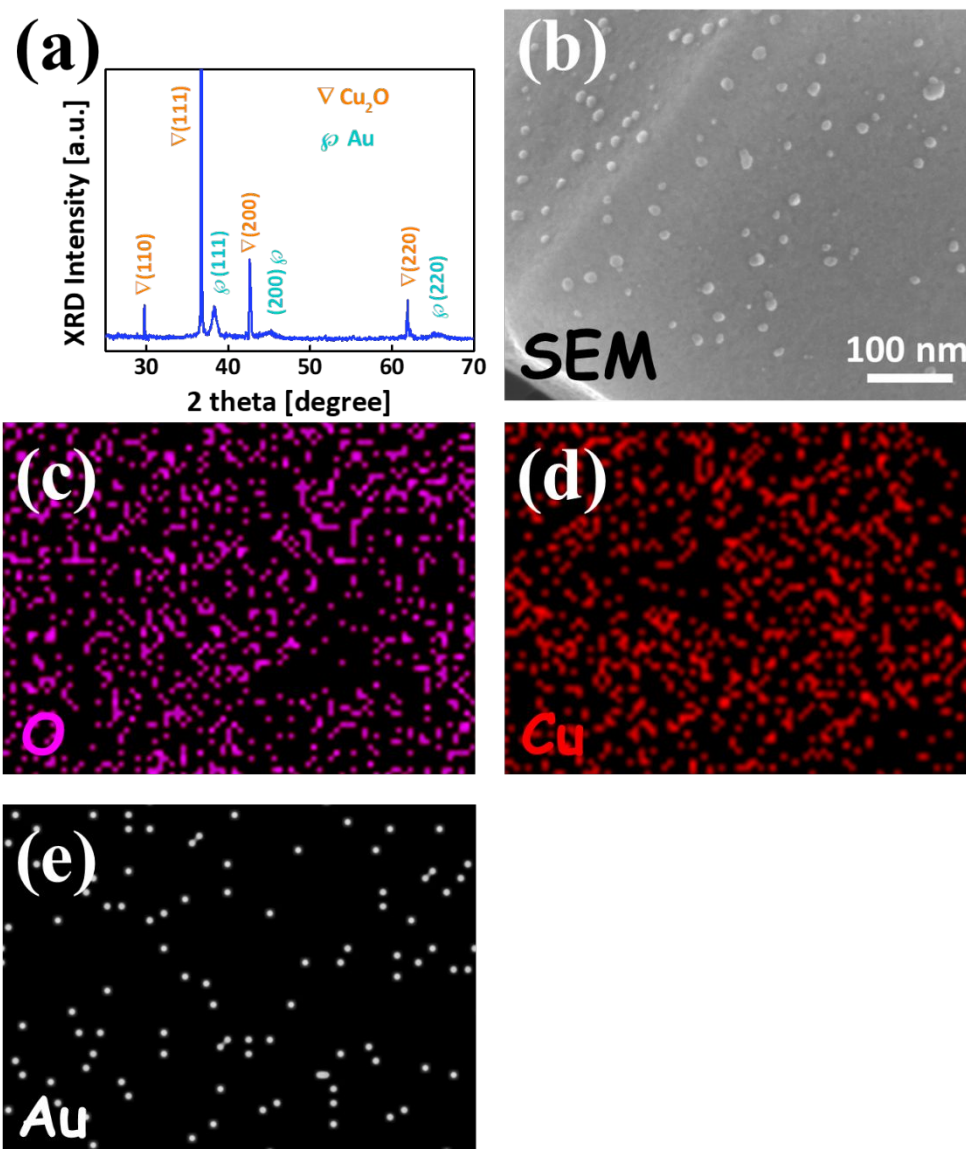

**Figure S4.** (a) XRD data of  $n\text{-Cu}_2\text{O}/\text{Au}/p\text{-Cu}_2\text{O}$  photocathode. (b) A SEM image of a top view for Au NPs atop  $p\text{-Cu}_2\text{O}$  with the corresponding elemental mapping images of (c) O, (d) Cu, and (e) Au.

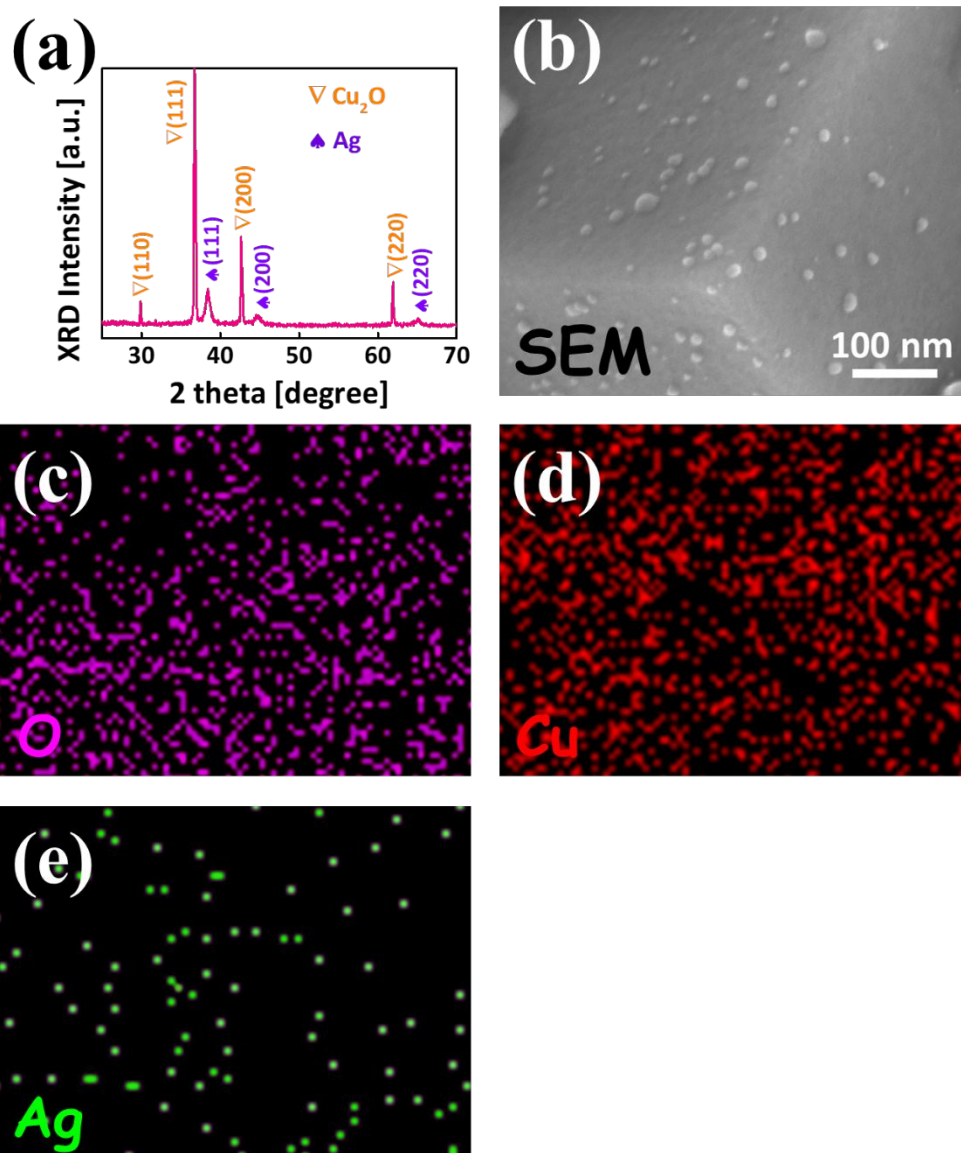

**Figure S5.** (a) XRD data of  $n\text{-Cu}_2\text{O}/\text{Ag}/p\text{-Cu}_2\text{O}$  photocathode. (b) A SEM image of a top view for Ag NPs atop  $p\text{-Cu}_2\text{O}$  with the corresponding elemental mapping images of (c) O, (d) Cu, and (e) Ag.

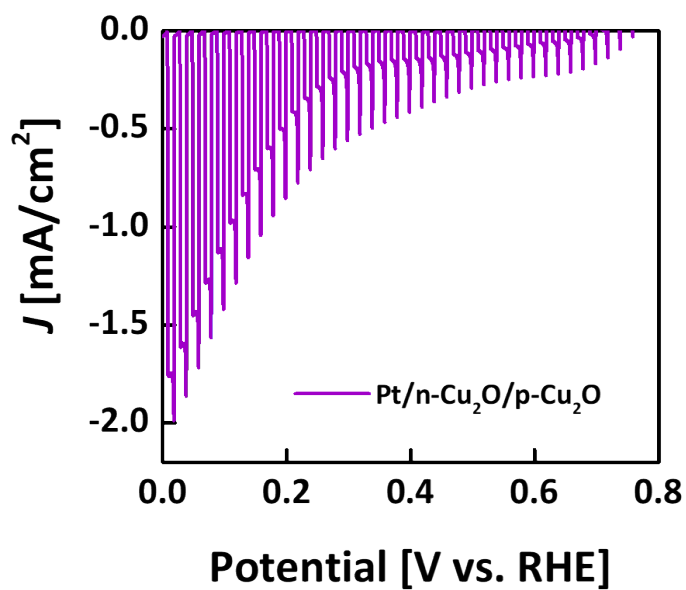

**Figure S6.** Pt/*n*-Cu<sub>2</sub>O/*p*-Cu<sub>2</sub>O with LSV measurement under chopped light illumination (100 mW/cm<sup>2</sup>). A 0.5 M Na<sub>2</sub>SO<sub>4</sub> solution was used as the electrolyte for this measurement.



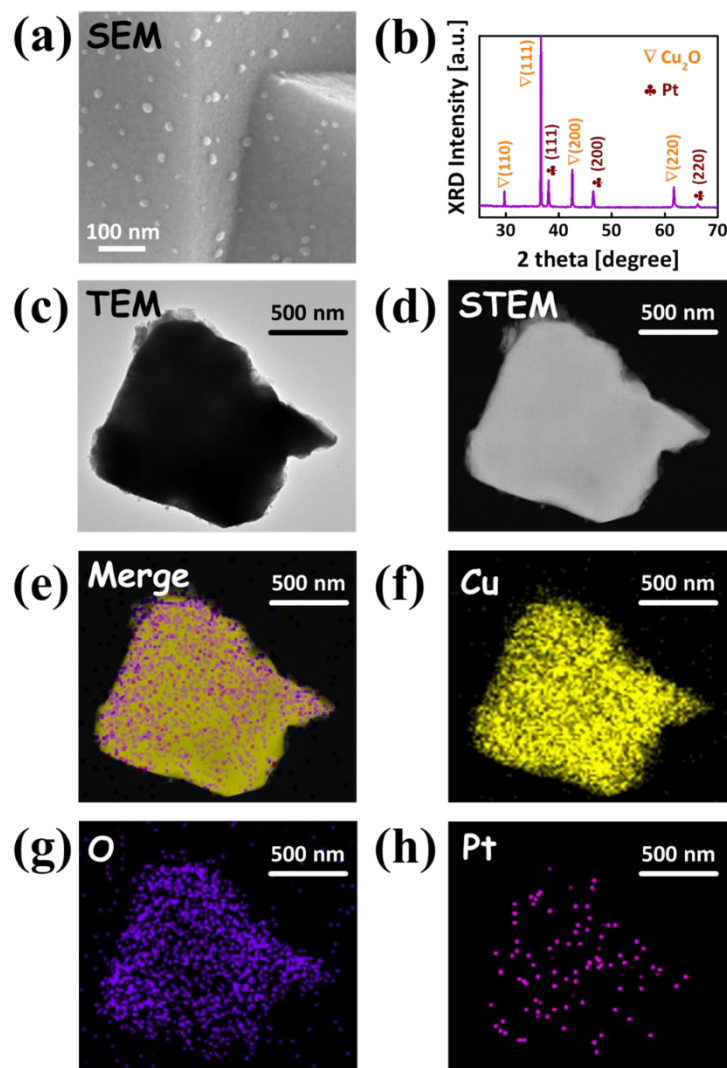

**Figure S7.** (a) SEM image of Pt NPs deposited dispersedly atop the *n*-Cu<sub>2</sub>O/*p*-Cu<sub>2</sub>O. (b) XRD patterns of Pt/*n*-Cu<sub>2</sub>O/*p*-Cu<sub>2</sub>O photocathode. (c) TEM, (d) STEM images of Pt/*n*-Cu<sub>2</sub>O/*p*-Cu<sub>2</sub>O with the corresponding element mappings of (e) merge, (f) Cu, (g) O, and (h) Pt.

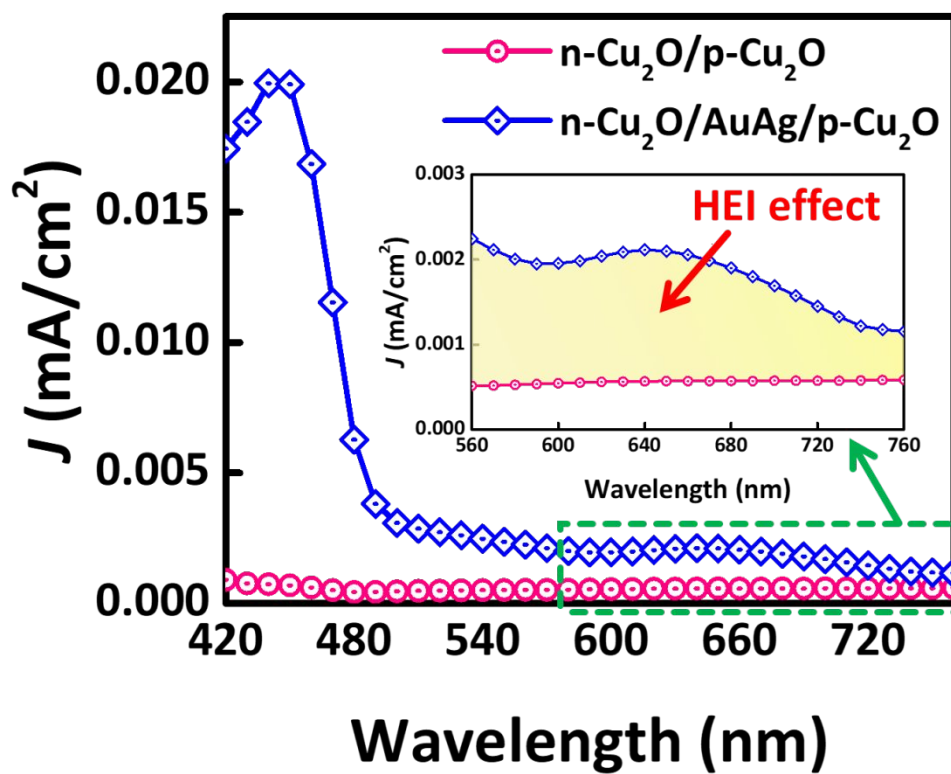

Figure S8. Wavelength-dependent photocatalytic activity of  $n\text{-Cu}_2\text{O}/\text{AuAg}/p\text{-Cu}_2\text{O}$  and  $n\text{-Cu}_2\text{O}/p\text{-Cu}_2\text{O}$  photocathodes measured at applied bias of 0.7  $V_{\text{RHE}}$ .

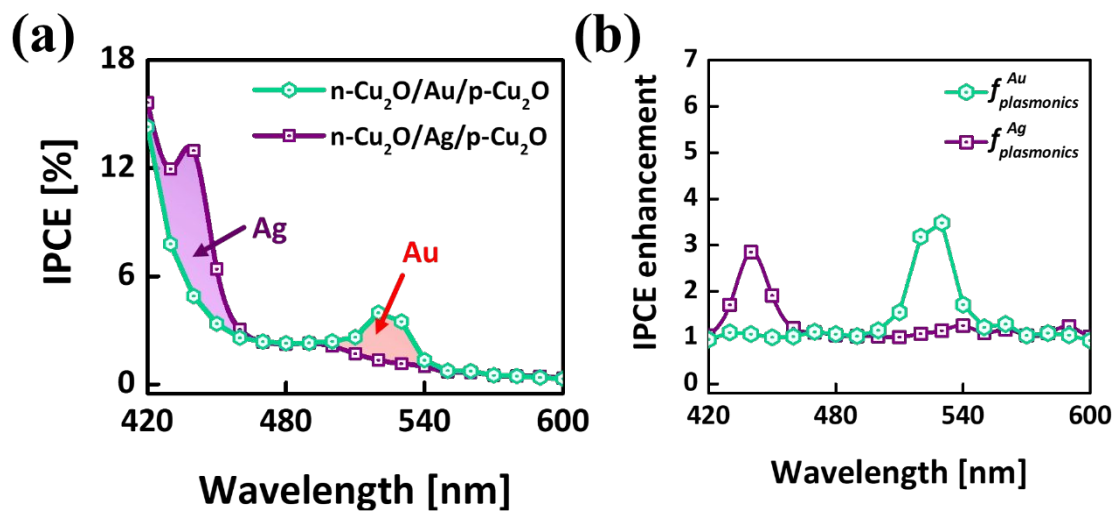

**Figure S9.** (a) IPCE characteristics and (b) IPCE enhancement spectra of  $n\text{-Cu}_2\text{O}/\text{Au}/p\text{-Cu}_2\text{O}$  and  $n\text{-Cu}_2\text{O}/\text{Ag}/p\text{-Cu}_2\text{O}$  photocathodes measured at applied bias of 0.7 V<sub>RHE</sub>.

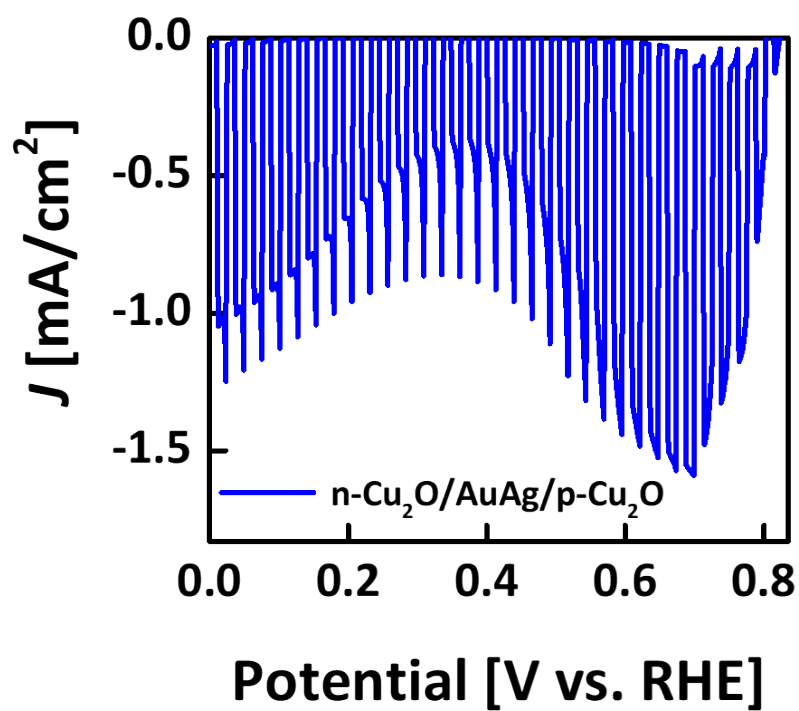

**Figure S10.**  $n\text{-Cu}_2\text{O}/\text{AuAg}/p\text{-Cu}_2\text{O}$  with LSV measurement under chopped light illumination ( $100 \text{ mW}/\text{cm}^2$ ). A  $0.5 \text{ M Na}_2\text{SO}_4$  solution was used as the electrolyte for this measurement.

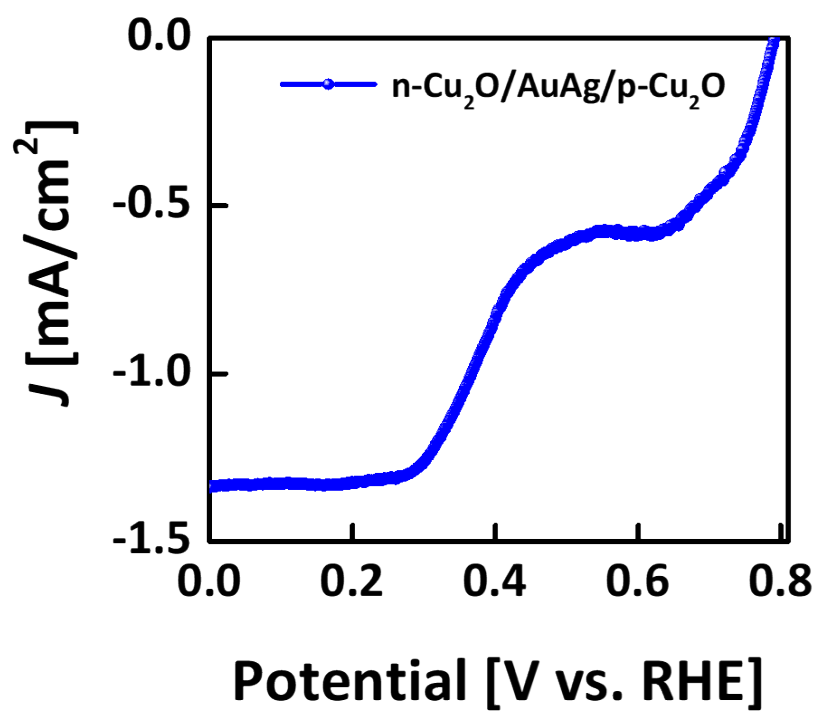

**Figure S11.** LSV measurement of the  $n\text{-Cu}_2\text{O}/\text{AuAg}/p\text{-Cu}_2\text{O}$  under consecutive light illumination ( $100 \text{ mW}/\text{cm}^2$ ). A  $0.5 \text{ M Na}_2\text{SO}_4$  solution was used as the electrolyte for this measurement.

The amount of hydrogen generation was detected and quantified by headspace gas analysis with Agilent 7890A Series gas chromatography (GC) equipped with a 5 Å molecular sieve column ( $\text{N}_2$  carrier gas at a flow rate of approximately  $3 \text{ mL min}^{-1}$ ). The temperature in a GC oven was measured with a thermal conductivity detector that was kept at  $40^\circ\text{C}$ . The electrochemical cell was purged with 2%  $\text{CH}_4$  in  $\text{N}_2$  for at least 30 min before PEC experiments; methane is used as an internal standard for  $\text{H}_2$  quantification by gas chromatography (GC). A 2.7 mL aliquots of the headspace gas was removed from the air-light electrochemical cell for GC analysis after applying the charge of 0.05 C (at 0.0 V vs. RHE for three-electrode system).<sup>60</sup>

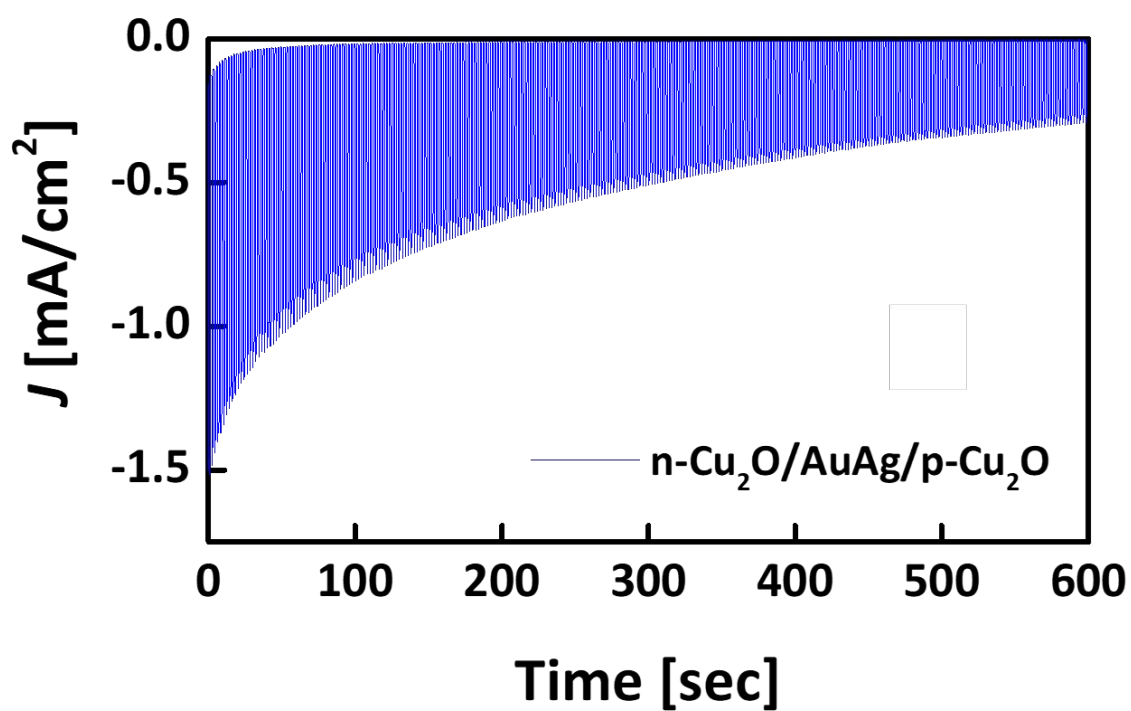

**Figure S12.** Stability of  $n\text{-Cu}_2\text{O}/\text{AuAg}/p\text{-Cu}_2\text{O}$  was examined using a chronoamperometry technique at a constant potential ( $0 \text{ V}_{\text{RHE}}$ ) under chopped light illumination ( $100 \text{ mW}/\text{cm}^2$ ) in a  $0.5 \text{ M Na}_2\text{SO}_4$  electrolyte.

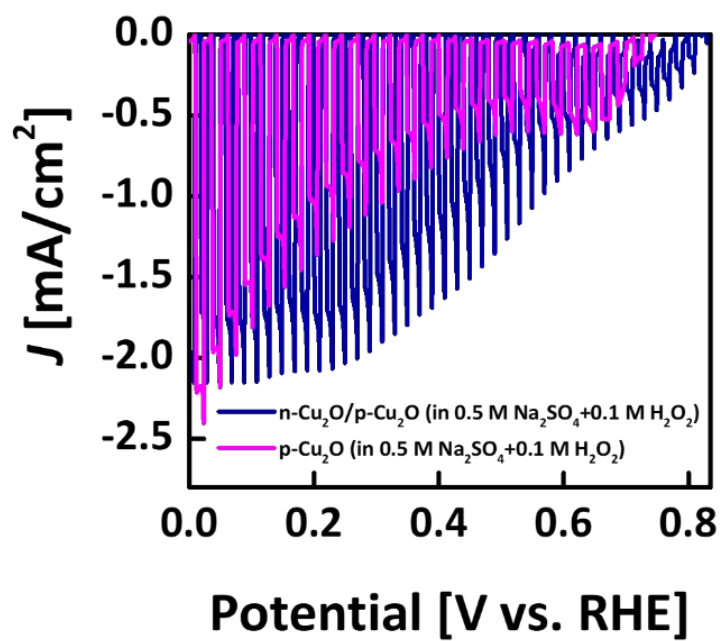

**Figure S13.** The LSV measurements of  $p\text{-Cu}_2\text{O}$  and  $n\text{-Cu}_2\text{O}/p\text{-Cu}_2\text{O}$  in the presence of  $\text{H}_2\text{O}_2$  sacrificial solution under chopped light ( $100 \text{ mW}/\text{cm}^2$ ).



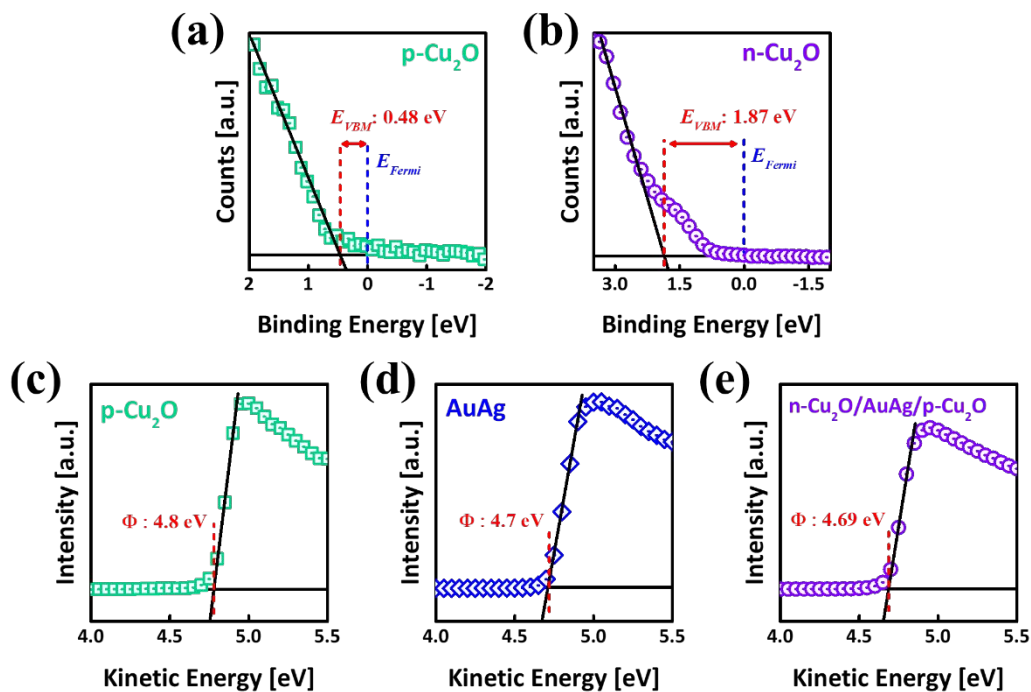

**Figure S14.** Valence band XPS spectrum of (a)  $p\text{-Cu}_2\text{O}$  and (b)  $n\text{-Cu}_2\text{O}$  in the region of the valence band maximum. The binding energy scale is with respect to the Fermi level ( $E_{Fermi}$ ). The valence band maximum occurs at the intersection of a line fit to the linear portion of the leading edge and the extended background line between the valence band maximum and the Fermi level. The work function of (c)  $p\text{-Cu}_2\text{O}$ , (d) AuAg, and (e)  $n\text{-Cu}_2\text{O}/\text{AuAg}/p\text{-Cu}_2\text{O}$  electrodes measured from ultraviolet photoelectron spectrum (UPS).

**Table S1.** Comparison of the reported photocathodes' onset potential.

| Photocathode                                                                              | Onset Potential                     | Ref.      |
|-------------------------------------------------------------------------------------------|-------------------------------------|-----------|
| <i>n</i> -Cu <sub>2</sub> O/AuAg/ <i>p</i> -Cu <sub>2</sub> O                             | 0.8 V <sub>RHE</sub>                | This work |
| Pt/ZnO/Al <sub>2</sub> O <sub>3</sub> /TiO <sub>2</sub> /Cu <sub>2</sub> O/Au             | ~ 0.5 V <sub>RHE</sub>              | [08]      |
| Pt/TiO <sub>2</sub> /ZnS/Cu <sub>2</sub> O/Au                                             | 0.72 V <sub>RHE</sub>               | [09]      |
| RuO <sub>x</sub> /TiO <sub>2</sub> /AZO/Cu <sub>2</sub> O/Au                              | 0.55 V <sub>RHE</sub>               | [10]      |
| RuO <sub>2</sub> /TiO <sub>2</sub> /AZO/Cu <sub>2</sub> O/Au                              | 0.5 V <sub>RHE</sub>                | [11]      |
| Pt/TiO <sub>2</sub> /Ga <sub>2</sub> O <sub>3</sub> /Cu <sub>2</sub> O                    | 1.02 V <sub>RHE</sub>               | [12]      |
| Pt/TiO <sub>2</sub> /Ga <sub>2</sub> O <sub>3</sub> /Cu <sub>2</sub> O                    | 1.0 V <sub>RHE</sub>                | [13]      |
| RuO <sub>x</sub> /TiO <sub>2</sub> /AZO/Cu <sub>2</sub> O NWs                             | 0.48 V <sub>RHE</sub>               | [14]      |
| TiO <sub>2</sub> /CuO/Cu <sub>2</sub> O NWs                                               | ~ 0.45 V <sub>RHE</sub>             | [16]      |
| ZnO/Cu <sub>2</sub> O/Ag                                                                  | ~ 0.4 V <sub>RHE</sub>              | [37]      |
| (PEI/NiPOM) <sub>n</sub> /Cu <sub>2</sub> O/Au                                            | ~ 0.5 V <sub>RHE</sub>              | [45]      |
| RuO <sub>x</sub> /TiO <sub>2</sub> /Ga <sub>2</sub> O <sub>3</sub> /Cu <sub>2</sub> O NWs | 1.0 V <sub>RHE</sub>                | [51]      |
| Graphene/Cu <sub>2</sub> O/Cu mesh                                                        | ~ 0.55 V <sub>RHE</sub>             | [55]      |
| Ni/CuO/Cu <sub>2</sub> O                                                                  | ~ 0.55 V <sub>RHE</sub>             | [56]      |
| CuO/Cu <sub>2</sub> O<br>composite                                                        | bilayered<br>~ 0.8 V <sub>RHE</sub> | [57]      |
| Pt/Cu <sub>2</sub> O/Au                                                                   | ~ 0.6 V <sub>RHE</sub>              | [58]      |
| BFO/Au/Cu <sub>2</sub> O                                                                  | 1.01 V <sub>RHE</sub>               | [59]      |
